# Supplementary material for: Weight Loss Outcomes Among Early High Responders to Exenatide Treatment: A Randomized, Placebo Controlled Study in Overweight and Obese Women
Source: PubMed Central journal article supplement (PMC8635796; doi:10.3389/fendo.2021.742873), 2021-11-17
Supplement: DataSheet_1.pdf [file DataSheet_1.pdf]

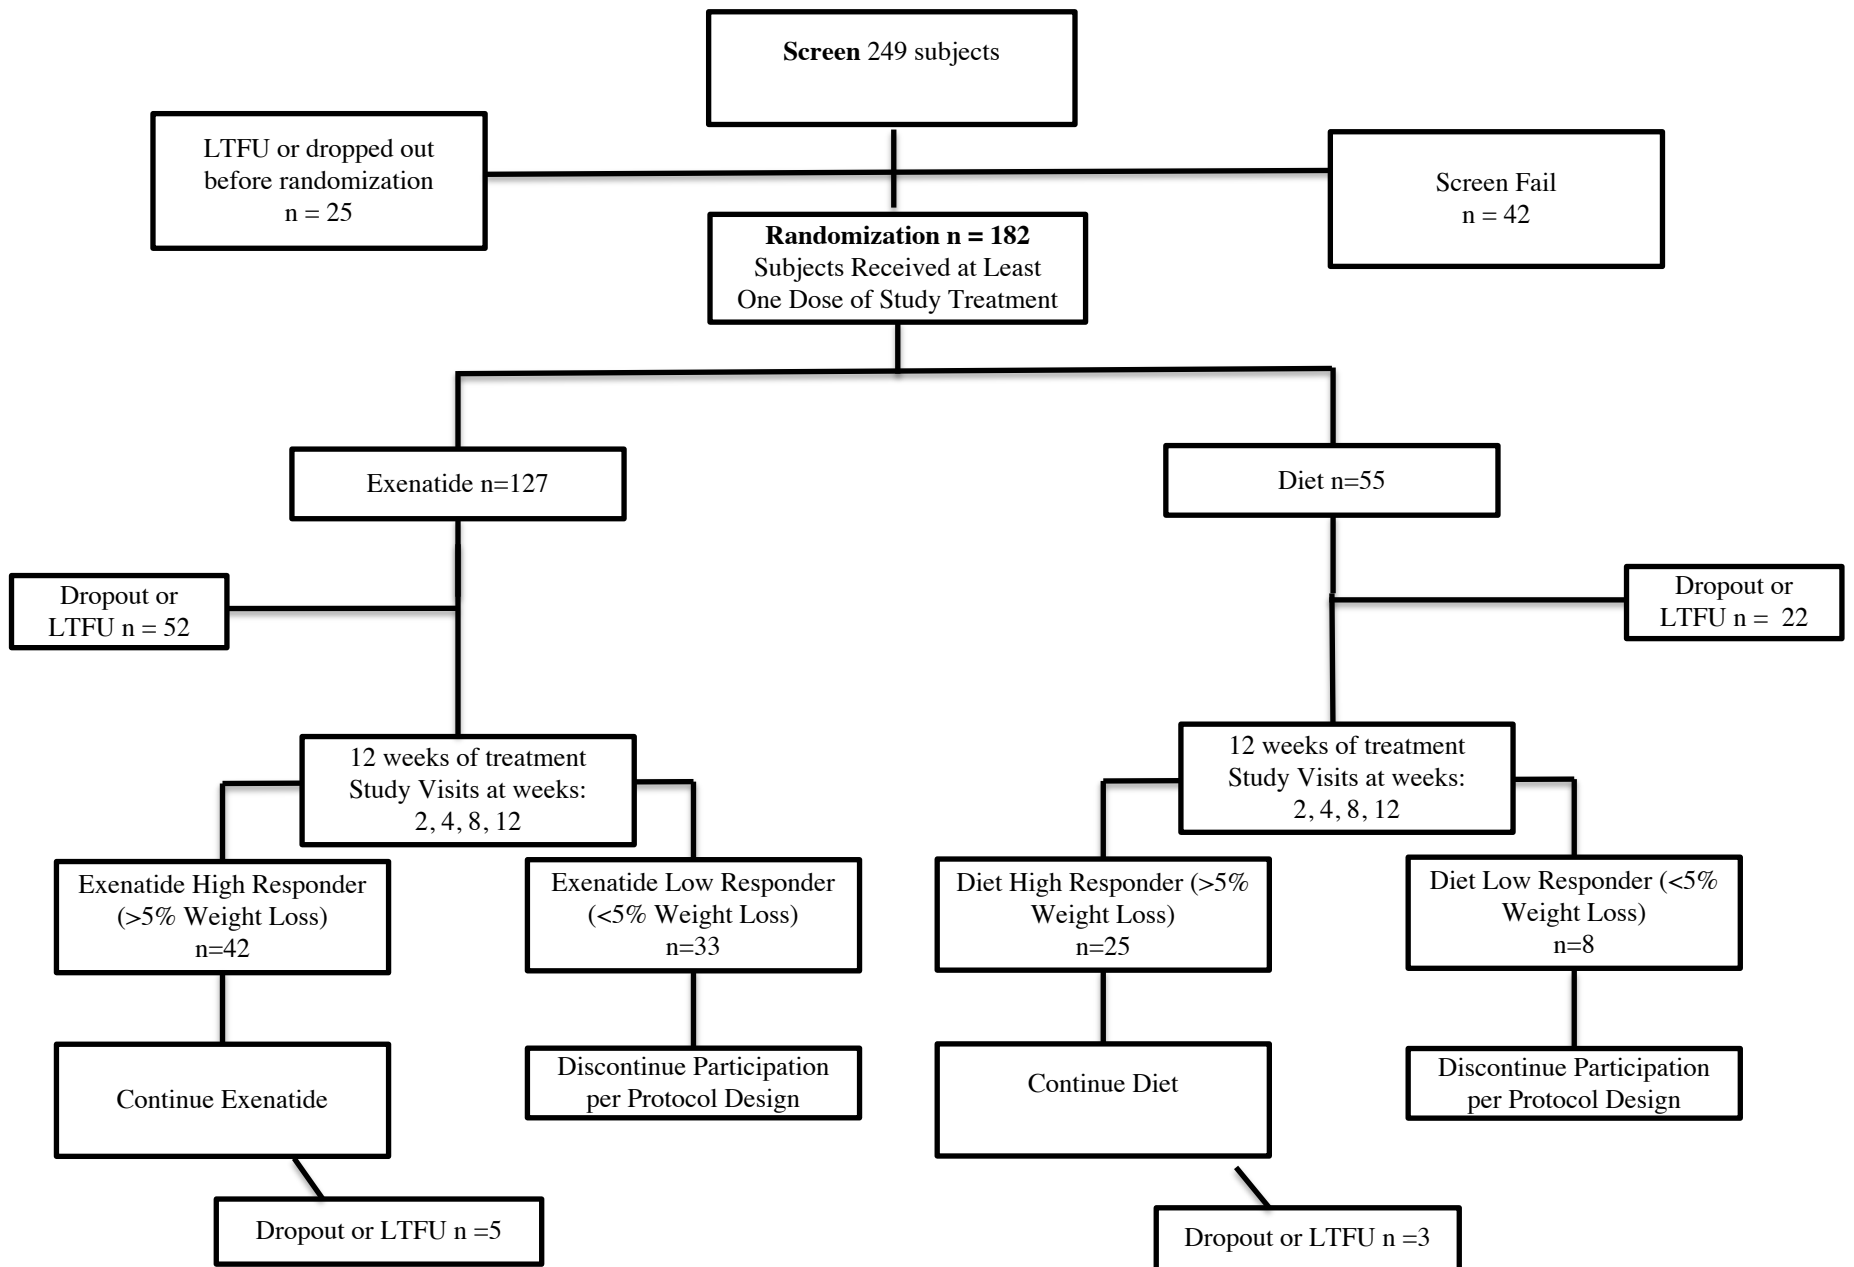

**Figure S1: Study design.**

|                                     | ER (n=42)      | DR(n=25)       | p    |
|-------------------------------------|----------------|----------------|------|
| Age (years)                         | 43.9 ± 12.1    | 44.8 ± 12.9    | 0.77 |
| BMI (kg/m <sup>2</sup> )            | 35.8 ± 5.4     | 35.0 ± 5.3     | 0.55 |
| Systolic BP (mmHg)                  | 125.0 ± 11.0   | 124.8 ± 13.1   | 0.92 |
| Diastolic BP (mmHg)                 | 73.3 ± 9.2     | 74.5 ± 12.3    | 0.67 |
| Heart Rate (bpm)                    | 68.0 ± 11.9    | 64.9 ± 12.2    | 0.30 |
| Total Cholesterol (mg/dL)           | 196.8 ± 34.3   | 196.6 ± 31.5   | 0.97 |
| HDL Cholesterol (mg/dL)             | 61.0 ± 19.3    | 60.0 ± 11.1    | 0.79 |
| LDL Cholesterol (mg/dL)             | 115.6 ± 30.8   | 114.8 ± 26.7   | 0.92 |
| Triglycerides (mg/dL)               | 111.0 ± 61.5   | 108.7 ± 53.7   | 0.88 |
| Hemoglobin A1c (%)                  | 5.6 ± 0.3      | 5.6 ± 0.3      | 0.79 |
| Waist Circumference (cm)            | 110.0 ± 11.5   | 111.5 ± 12.4   | 0.61 |
| Resting Energy Expenditure (kCal/d) | 1548.9 ± 224.4 | 1542.5 ± 194.6 | 0.91 |
| Percent Body Fat (%)                | 44.0 ± 4.4     | 43.8 ± 3.8     | 0.87 |

**Table S1:** Baseline characteristics of responders in both treatment groups (n=67). ER = exenatide responder. DR = diet responder

**A**

|                                     | Odds Ratio | Confidence Interval |
|-------------------------------------|------------|---------------------|
| Age (years)                         | 1.03       | 0.97 – 1.09         |
| Weight (kg)                         | 0.98       | 0.98 – 1.20         |
| BMI (kg/m <sup>2</sup> )            | 0.75       | 0.56 – 1.01         |
| Waist Circumference (cm)            | 1.05       | 0.96 – 1.13         |
| Total Cholesterol (mg/dL)           | 0.99       | 0.97 – 1.01         |
| Resting Energy Expenditure (kCal/d) | 1.16       | 0.94 – 1.42         |

**B**

|                           | Adjusted Odds Ratio | Confidence Interval |
|---------------------------|---------------------|---------------------|
| Age (years)               | 1.01                | 0.98 – 1.05         |
| Weight (kg)               | 1.007               | 0.98 – 1.04         |
| Waist Circumference (cm)  | 2.00                | 0.84 – 4.83         |
| Total Cholesterol (mg/dL) | 1.00                | 0.99 – 1.02         |

**Table S2:** (A) Metabolic predictors of high responder status for both treatment groups (B) Metabolic predictors of super responder status for both treatment groups.

**Table S3. Differences in baseline metabolite levels in responders compared to super responders within treatment groups.**

| Exenatide Treatment Group |                    |                          |       |
|---------------------------|--------------------|--------------------------|-------|
| Metabolite                | Responder (n = 22) | Super Responder (n =14)  | P     |
|                           | Mean (SD)          | Mean (SD)                |       |
| Anandamide                | 0.64 (0.20)        | 0.98 (0.35)              | 0.001 |
| Sarcosine                 | 0.84 (0.29)        | 1.18 (0.27)              | 0.002 |
| X5 Hydroxytryptophan      | 1.81 (0.86)        | 2.37 (0.77)              | 0.01  |
| C18 Carnitine             | 0.70 (0.25)        | 0.89 (0.22)              | 0.02  |
| Aminoisobutyric Acid      | 0.87 (0.30)        | 1.06 (0.21)              | 0.02  |
| Serotonin                 | 1.80 (0.83)        | 2.36 (0.77)              | 0.02  |
| N-Acetyl-L-Alanine        | 0.75 (0.26)        | 0.96 (0.26)              | 0.04  |
| Diet Treated Group        |                    |                          |       |
| Metabolite                | Responder (n = 11) | Super Responder (n = 12) | P     |
|                           | Mean (SD)          | Mean (SD)                |       |
| Niacinamide               | 0.63 (0.18)        | 0.90 (0.25)              | 0.02  |
| Anthranilic Acid          | 0.67 (0.13)        | 0.89 (0.27)              | 0.02  |
| Glycerol                  | 1.12 (0.25)        | 1.40 (0.32)              | 0.02  |

Data is presented as mean (standard deviation) LC-MS spectra peak intensity after normalization to pooled plasma for each metabolite in Exenatide treated responders (n = 22) compared to Exenatide super responders (n = 14) and diet treated responders (n = 11) compared to placebo super responders (n = 12). P values were calculated using Wilcoxon rank sum on log transformed peak areas.

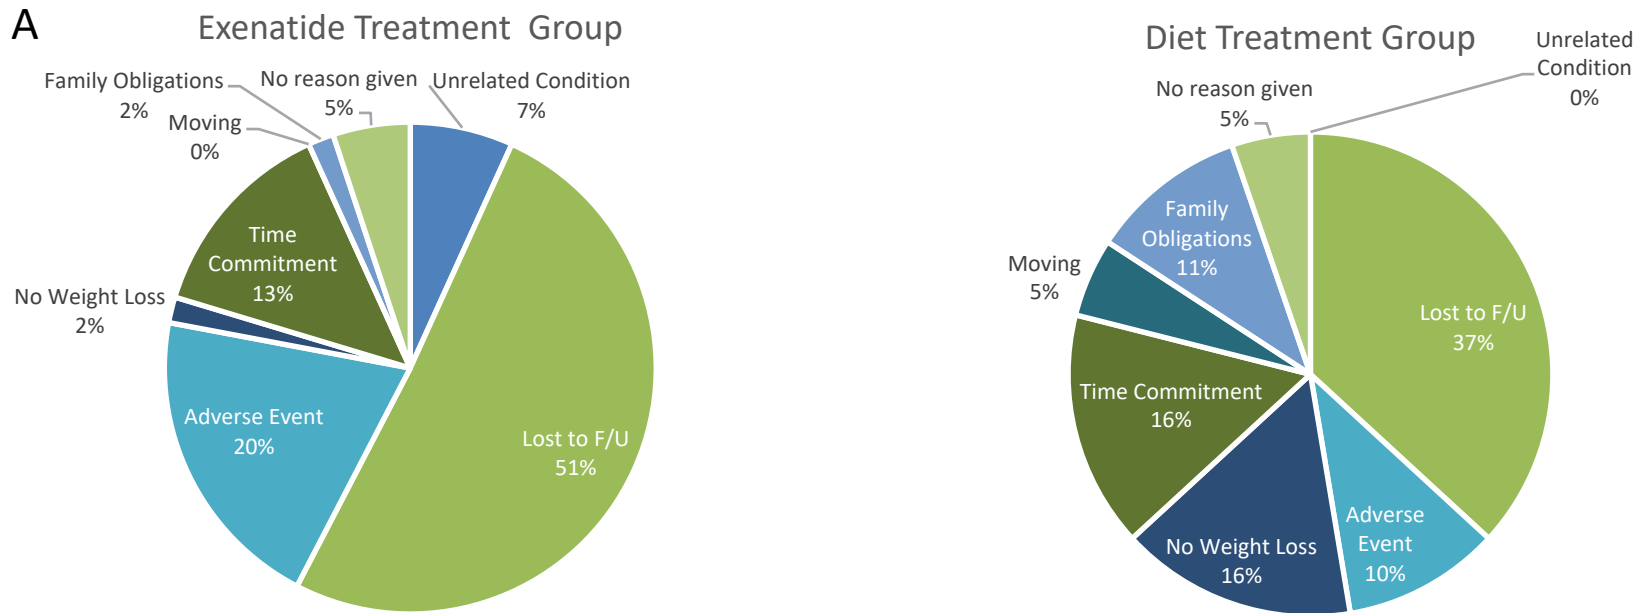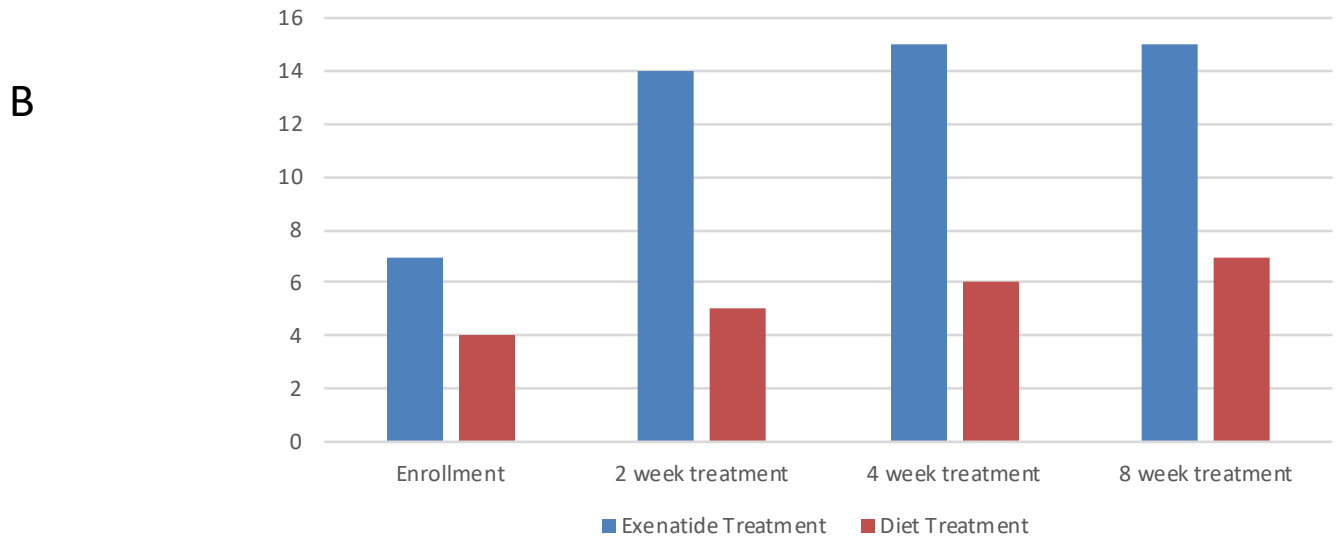

Figure S2: (A) Dropout by Treatment Group (B) Dropout by Study Visit
